# Supplementary material for: Unequal evolutionary conservation of human protein interactions in interologous networks
Source: PubMed Central journal article supplement (PMC1929159; doi:10.1186/gb-2007-8-5-r95), 2007-05-29

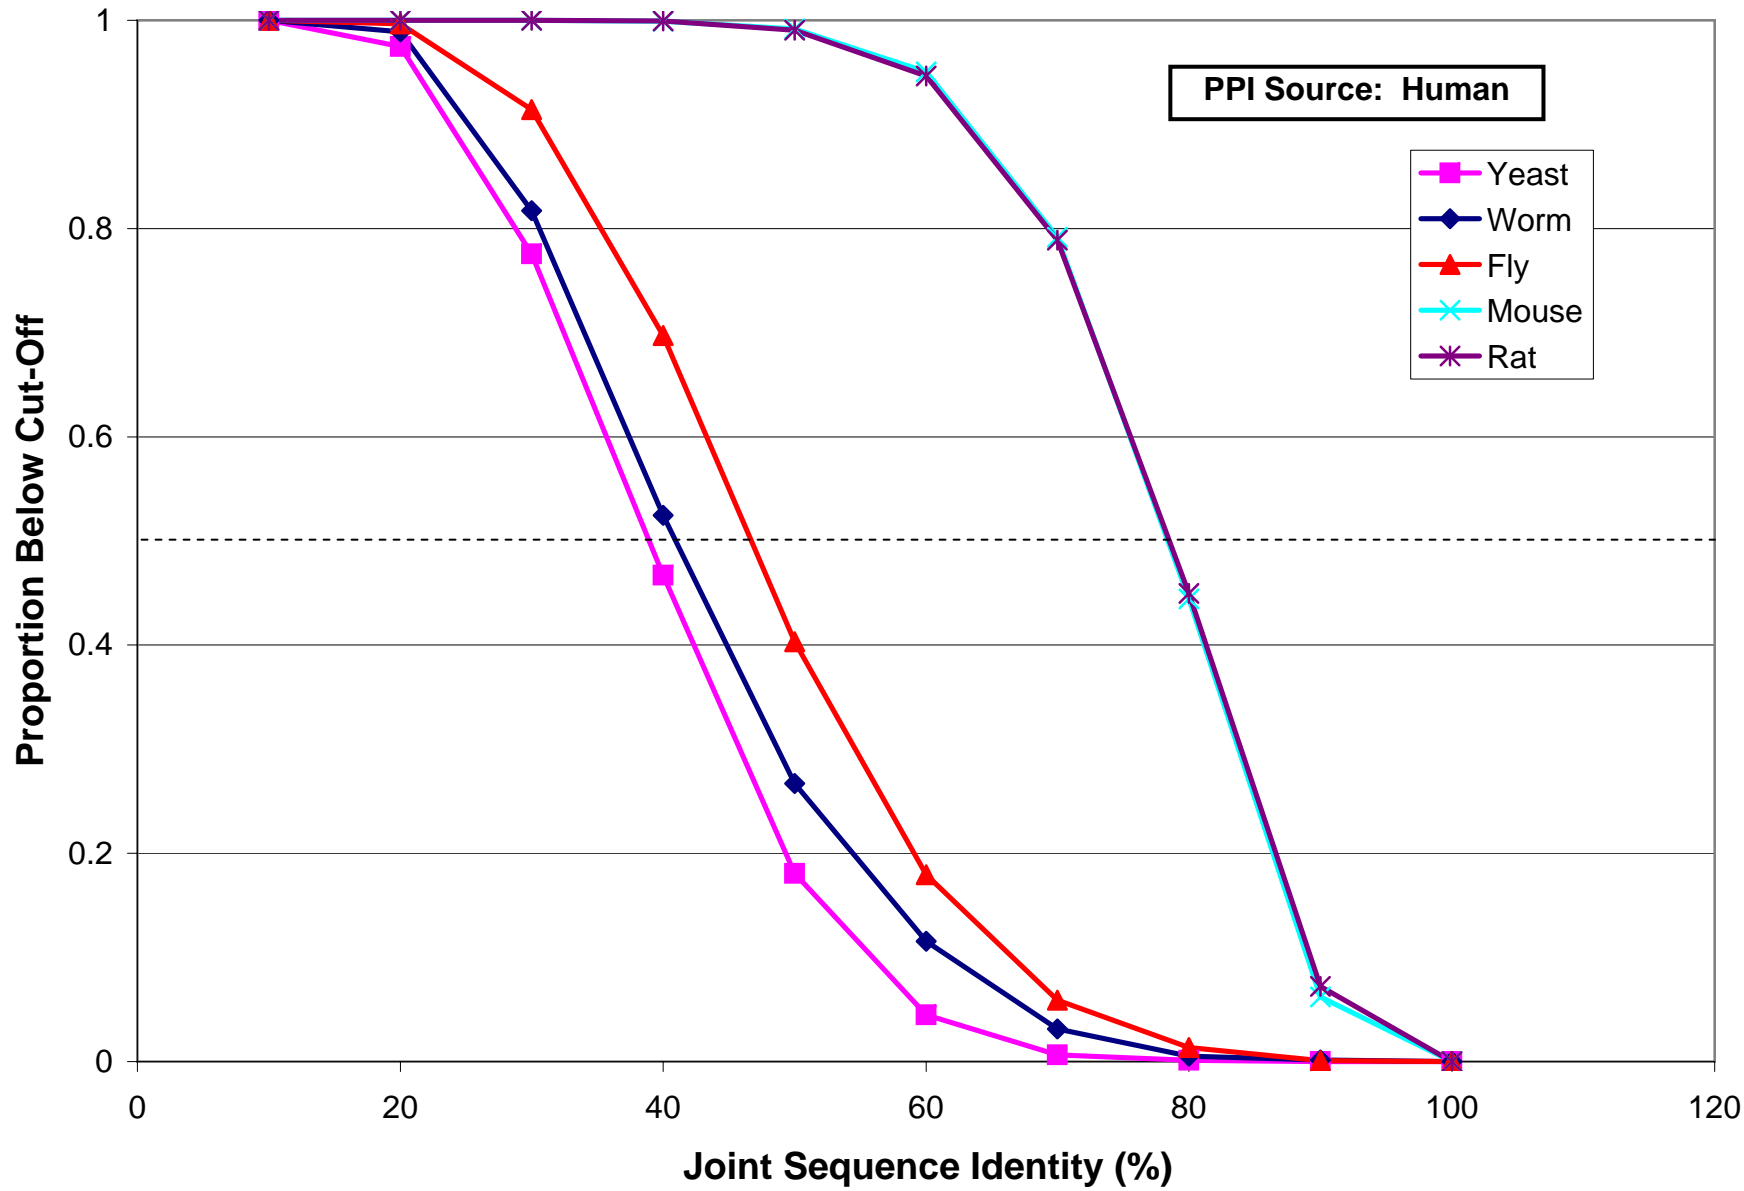

Supplement: gb-2007-8-5-r95-S4.pdf [file gb-2007-8-5-r95-S4.pdf]
